# Supplementary material
Source: MDPI journal article supplement (https://www.mdpi.com/2076-3298/9/2/19)
Supplement: s1 [file s1]

# Characterization of the dynamics of leachate contamination plumes in the surrounding of the Hulene - B waste dump, Maputo, Mozambique

Bernardino Bernardo<sup>1,2</sup>, Carla Candeias<sup>1</sup>, Fernando Rocha<sup>1,\*</sup>

<sup>1</sup> GeoBioTec Research Centre, Department of Geosciences, University of Aveiro, 3810-193, Aveiro, Portugal. candeias@ua.pt; tavares.rocha@ua.pt.

<sup>2</sup> Faculty of Earth Sciences and Environment, Pedagogic University of Maputo, Mozambique. nhacundela.berna@gmail.com; bernardino.bernardo@ua.pt.

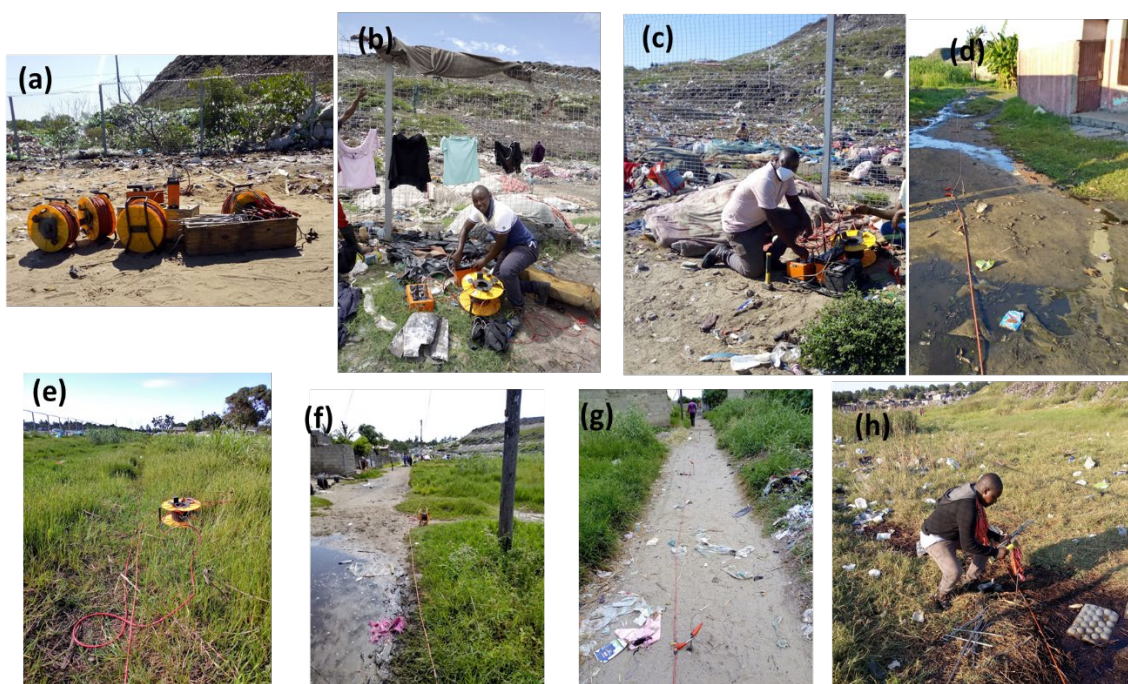

Figure S1: (a) Resistivity meter applied in data acquisition, (b) data acquisition in January 2020 (profile 2), (c) data acquisition in profile 2 May 2021, (d) southern section of profile 1 2021, (e) central section of profile 1 2020, (f) western section of profile 2 2020, (g) northern section of profile 3, (h) electrode connection in the northwest section of profile 4, 2021.
